# Supplementary material
Source: ML conference proceedings conference paper supplement (https://proceedings.neurips.cc/paper_files/paper/2021/hash/96bf57c6ff19504ff145e2a32991ea96-Abstract.html)
Supplement: Supplementary file 1 [file 96bf57c6ff19504ff145e2a32991ea96-Supplemental.zip]

Archive with 2 entries (2 files):
- supplementary.mp4
- supplementary.pdf
